# Supplementary material
Source: Springer Nature journal article supplement (https://www.springermedizin.de/resource/supplementary/12889_2010_3516_MOESM1_ESM.pdf/9489156)

118 women on HAART  
followed up in the cohort

23 started HAART  
before enrollment in the cohort

95 women started HAART  
during follow-up in the cohort

47 FSWs  
111 person-years of follow-up

48 non FSWs  
122 person-years of follow-up

6 had some data censored  
2 dropped out  
4 died

5 had some data censored  
5 dropped out  
0 died

47 FSWs  
Included in analysis

48 non FSWs  
Included in analysis

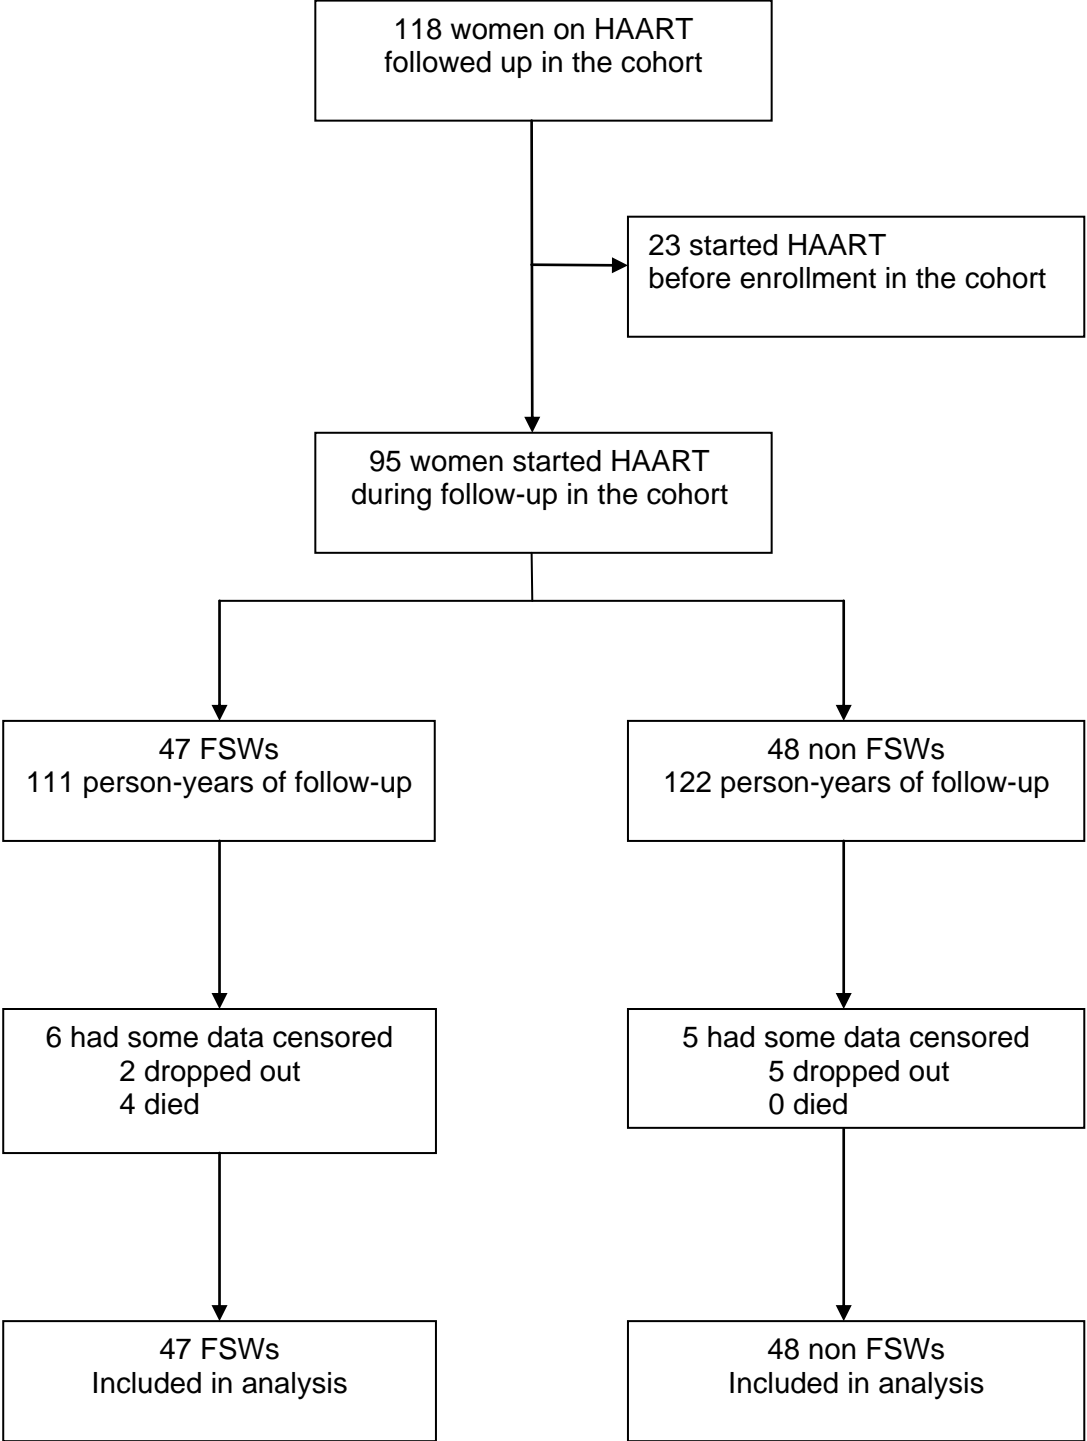

Supplement: MOESM1 [file 9489156]
